# Supplementary material
Source: publisher figshare collection journal article supplement (https://frontiersin.figshare.com/ndownloader/files/12927437)

**FIGURE S2 |** Pearson's correlation between observed and predicted phenotypes for 20 replicates of 5-fold cross-validations in the Arabidopsis population.

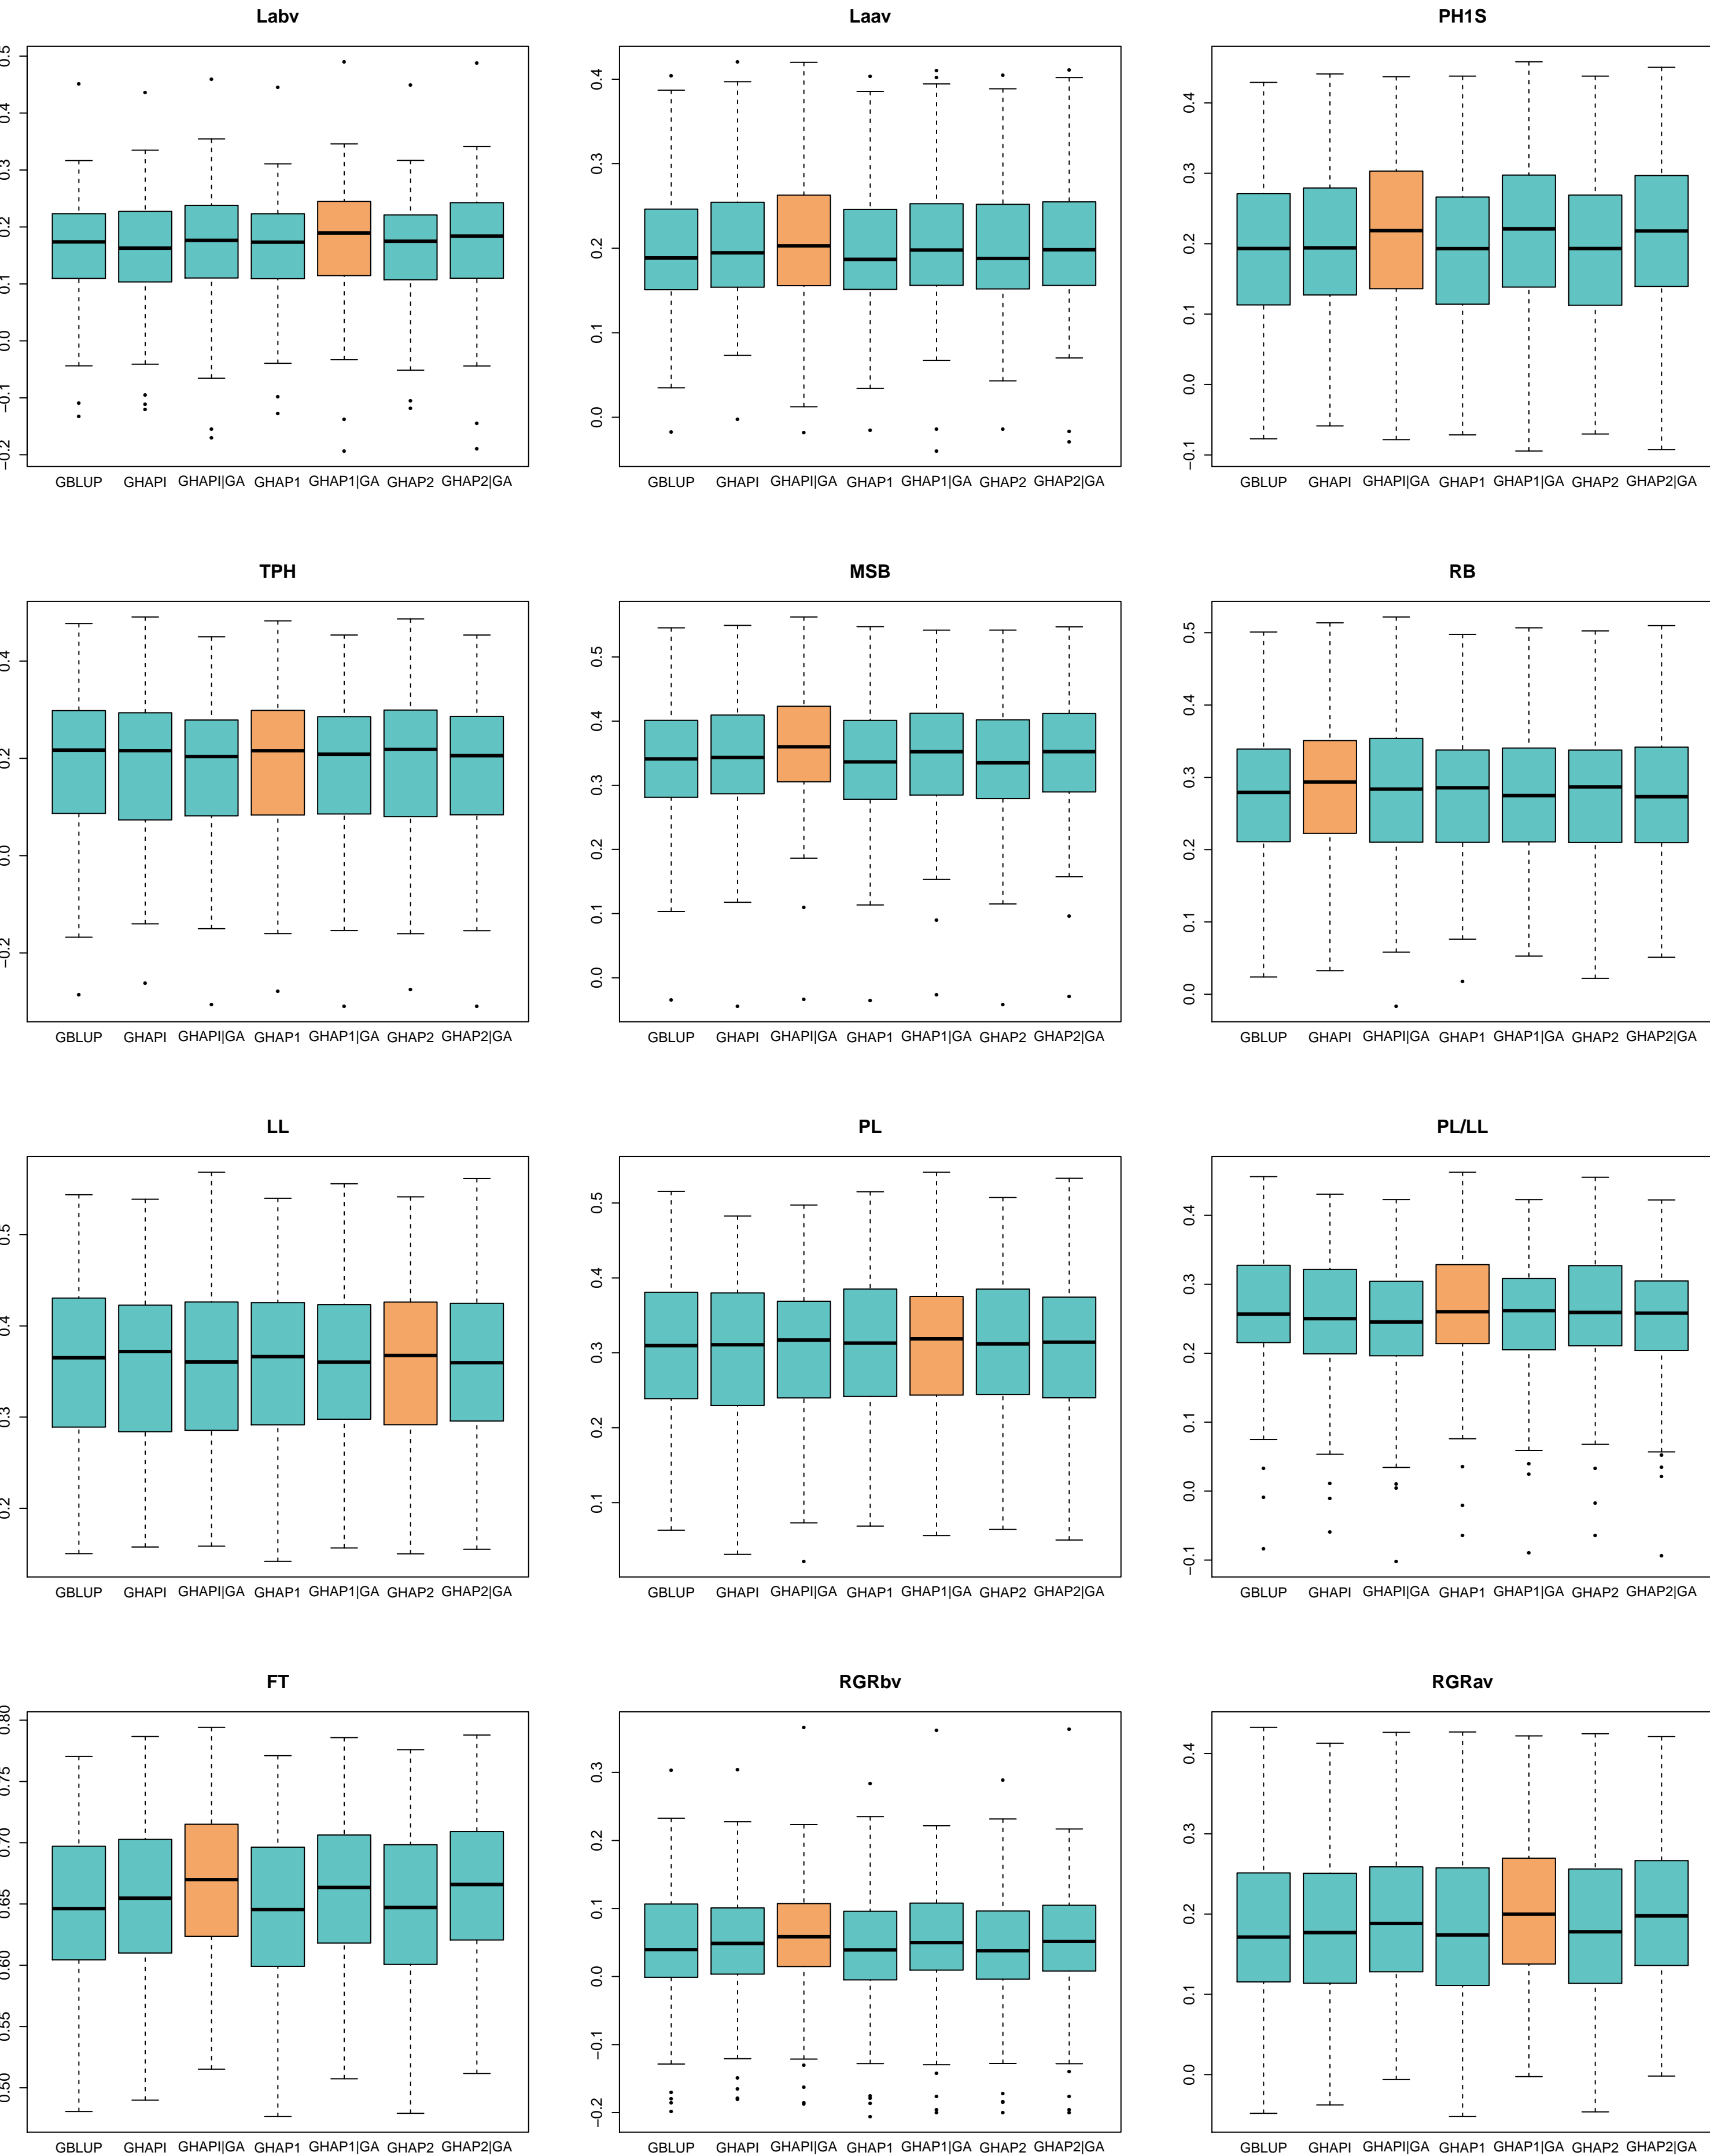

Supplement: Supplementary file [file 12927437]
